# Supplementary material for: What can be learnt from a qualitative evaluation of implementing a rapid sexual health testing, diagnosis and treatment service?
Source: HighWire-hosted journal article supplement (doi:10.1136/bmjopen-2021-050109), 2021-10-01
Supplement: bmjopen-2021-050109supp003_data_supplement.pdf [file bmjopen-2021-050109supp003_data_supplement.pdf]

| <b>Elements of rapid STI service implementation</b>                                                                                             |                                                                                                                                                                                                          |
|-------------------------------------------------------------------------------------------------------------------------------------------------|----------------------------------------------------------------------------------------------------------------------------------------------------------------------------------------------------------|
| <b>What</b>                                                                                                                                     | <b>Who should do this</b>                                                                                                                                                                                |
| <b>Changes to documentation</b>                                                                                                                 |                                                                                                                                                                                                          |
| Rewrite and sign-off treatment guidelines and SOPs when new processes are agreed.                                                               | Project leads, clinical lead, project implementation/operations team and clinical governance guideline group                                                                                             |
| Change the triage process and form.                                                                                                             | Project operations team, to include reception staff                                                                                                                                                      |
| Consider changes to IT system/medical records system.                                                                                           | Project leads, consultant and project implementation team                                                                                                                                                |
| <b>Implementation of the actual machine and process</b>                                                                                         |                                                                                                                                                                                                          |
| Write business case for new rapid STI service and have it signed off by PHE.                                                                    | Clinic lead, clinic manager, lead consultant, project manager, in collaboration with PHE.                                                                                                                |
| Source the machine, find space for it (with waste disposal) and install it. Arrange insurance (including negotiations with PHE and legal teams) | Clinic lead, operations manager, lead consultant, PHE, nursing lead                                                                                                                                      |
| Ensure IT systems allow direct transfer of data from Panther                                                                                    | Project lead, clinic manager                                                                                                                                                                             |
| Pilot before implementing with all patients                                                                                                     | All staff including reception teams                                                                                                                                                                      |
| Write protocol for Panther outages                                                                                                              | Project leads, in collaboration with PHE.                                                                                                                                                                |
| Quality assessment scheme /UKAS accreditation                                                                                                   | PHE team                                                                                                                                                                                                 |
| <b>Services</b>                                                                                                                                 |                                                                                                                                                                                                          |
| Consider impact on other services                                                                                                               | Project operations team                                                                                                                                                                                  |
| Adjust clinic timetabling to accommodate rapid STI service appointments                                                                         | Operations manager                                                                                                                                                                                       |
| Changing medical history forms and process to accommodate the new appointment structure                                                         | Project leads and implementation team                                                                                                                                                                    |
| Changes to the IT coding                                                                                                                        | Clinic data manager, project lead, clinic manager, clinical lead (minor)                                                                                                                                 |
| <b>Staff engagement, training and communication</b>                                                                                             |                                                                                                                                                                                                          |
| Put together an implementation team, to oversee implementation, and put in place mechanisms for all staff to feedback to this team              | Representative from each staff group and clinic manager.                                                                                                                                                 |
| Clarify communication pathways between all staff and the implementation team                                                                    | Clinic Manager, project leads                                                                                                                                                                            |
| Consider the impact on staff roles and workload and if staffing changes are therefore needed                                                    | Project operations team                                                                                                                                                                                  |
| Regular meetings for staff involved in the new service                                                                                          | Possible staff to include: project leads, HAs, consultants, nursing assistants, nurses, administrative staff, researchers, IT lead, clinic manager, data manager, chlamydia screening program team lead. |
| Staff training and regular updates at existing staff training sessions                                                                          | Led by project leads, all staff to attend                                                                                                                                                                |
| Regular departmental meetings                                                                                                                   | Project leads and clinical lead                                                                                                                                                                          |
| <b>Patient communication</b>                                                                                                                    |                                                                                                                                                                                                          |
| Communicate changes to patients – write leaflets/posters/website                                                                                | Project leads                                                                                                                                                                                            |
